# Supplementary material for: Immobilization of laccase on different functional groups and degree of conjugation modified COFs for simultaneous photochemical-enzymatic removal of 2,4-dichlorophenol and uranium (U( vi ))
Source: Royal Society of Chemistry journal article supplement (doi:10.1039/d4tc05149a), 2025-01-01
Supplement: d4tc05149a1.pdf [file d4tc05149a1.pdf]

# **Immobilization of laccase on functional groups and degree of conjugation modified COFs for simultaneous Photochemical-Enzymatic removal of 2,4-dichlorophenol and uranium U(VI)**

Xin Zhong<sup>\*</sup>, Zhehong Ji, Qian Ling, Lifu Sun, Baowei Hu

School of Life and Environmental Sciences, Shaoxing University, Huancheng West Road 508, Shaoxing 312000, P.R. China

Corresponding author e-mail:

Xin Zhong: [zhongxinmagic@163.com](mailto:zhongxinmagic@163.com)

## 1. Chemicals

1,3,5-triformylphloroglucinol (Tp, 97%) was obtained from Jilin Yanshen Technology (China). Laccase (from *Trametes versicolor*, 0.5 U·mg<sup>-1</sup>, EC 1.10.3.2), 2,4-dichlorophenol (2,4-DCP), glutaraldehyde (GA, 25 % in v/v, aqueous solution), UO<sub>2</sub>(NO<sub>3</sub>)<sub>2</sub>·6H<sub>2</sub>O (99.5%), mesitylene (98%), acetic acid (99.5%), 1,4-dioxane (99.5%), 2,2'-azino-bis(3-ethylbenzothiazoline-6-sulfonic acid (ABTS, 99%), 1,4-diaminobenzene (Pa-1, 99%), benzidine (BD, 97%), 4,4''-Diamino-p-terphenyl (TPA, 98%), 2,5-diaminohydroquinone dihydrochloride (Pa-(OH)<sub>2</sub>·2HCl, 97%), 2-nitro-1,4-phenylenediamine (Pa-NO<sub>2</sub>, 98%), 3,3'-dinitrobenzidine (BD(-NO<sub>2</sub>)<sub>2</sub>, 95%), 3,3'-dihydroxybenzidine (BD(-OH)<sub>2</sub>, 99%) and other reagents were purchased from Macklin Biochemistry Co., Ltd (Shanghai, China).

## 2. Characterization

XRD spectra were obtained on a Bruker D8 diffractometer. FT-IR spectra were collected on a ThermoFisher Nicolet NEXUS 670 spectrophotometer. The morphologies of COFs-TpPa-X were photographed on SEM (JEOL-7800F) and HRTEM-Mapping (HAADF-STEM, JEOL-2100F). Thermogravimetric analysis (TGA) was conducted on a SDT650-TA Instruments by heating from 20 to 800 °C with 10 °C/min in N<sub>2</sub> atmosphere. The BET specific surface areas were obtained from Micromeritics ASAP 2020 apparatus. XPS analysis and work function calculation (PS spectra, He lamp 21.21 eV) were performed measured on using a Thermo Fisher ESCALAB 250Xi. The UV-visible diffused reflectance spectra (UV-vis DRS) were tested on a Shimadzu UV-2600 spectrophotometer with BaSO<sub>4</sub> as the background.

Confocal microscope images were captured by laser confocal scanning microscope (OLYMPUS FV1200). The electron spin resonance (ESR) spectra were detected by a Bruker MS 5000 instrument under visible light irradiation (300 W, lamp Au-Light). Free radicals  $\bullet\text{O}_2^-$  and  $^1\text{O}_2$  were detected by ESR using 5, 5-dimethyl-1-pyrroline-N-oxide (DMPO) and 2, 2, 6, 6-tetramethyl-4-piperidinol (TEMP) as trapping agents, respectively. Transient photocurrent responses (*i-t*) and electrochemical impedance spectra (EIS) were carried out on a Shanghai Chenhua CHI 660E workstation with a standard three-electrode system.

### 3. Figures and tables

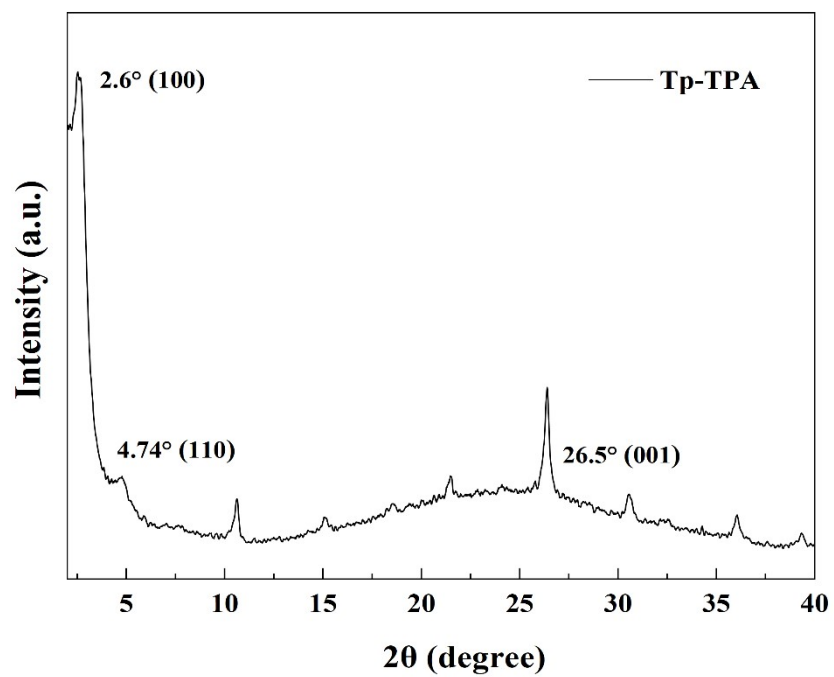

Fig. S1 The XRD pattern of Tp-TPA

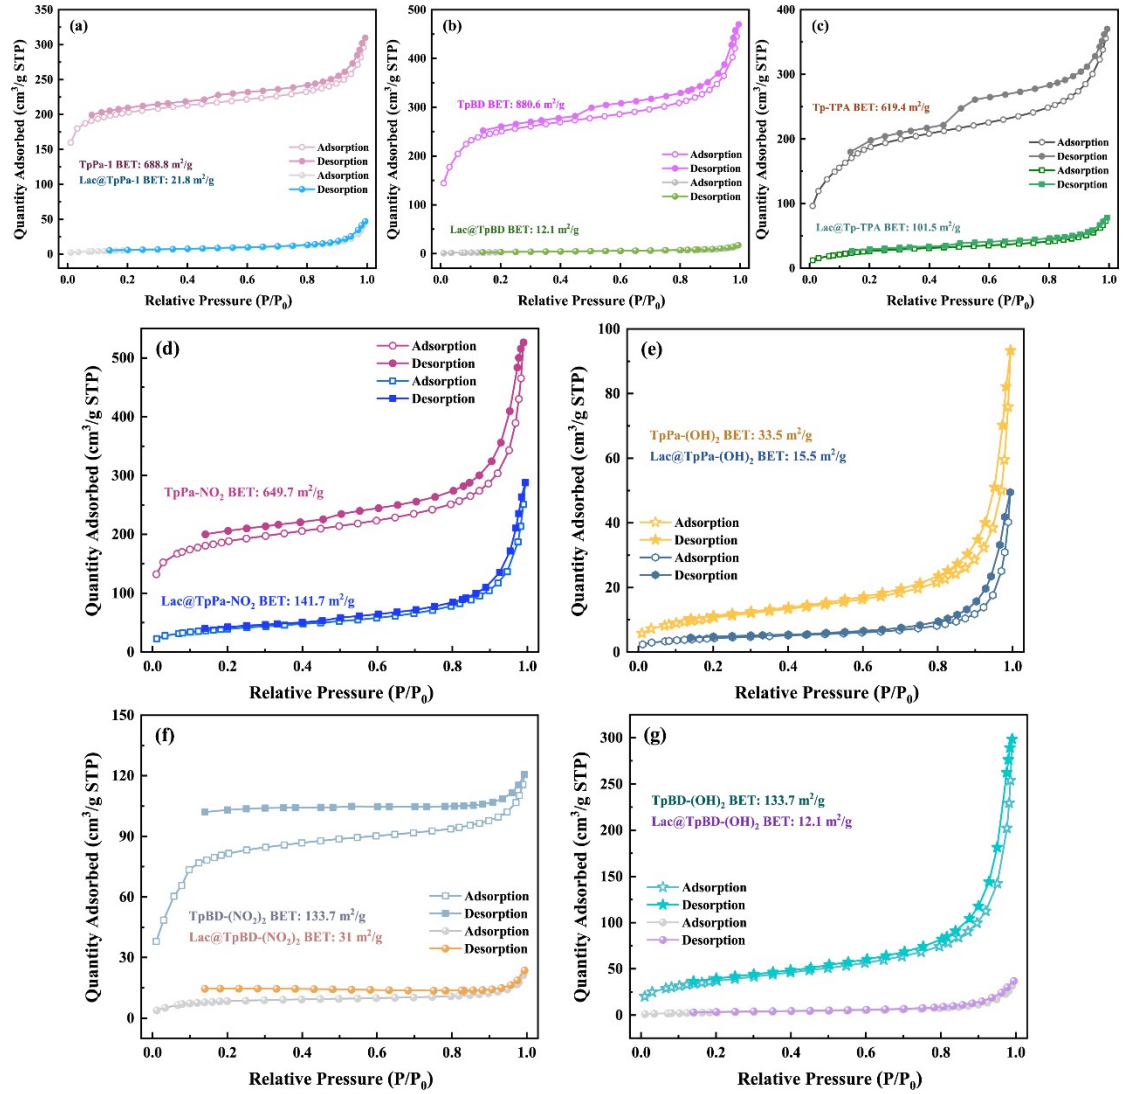

Fig. S2 The  $N_2$  adsorption-desorption isotherms of COFs and laccase immobilized COFs.

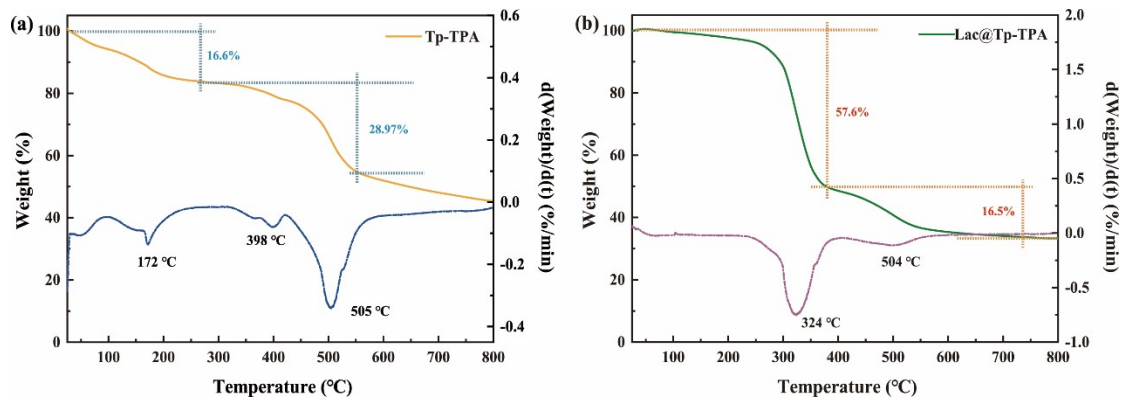

Fig. S3 The TGA curves of (a) Tp-TPA and (b) Lac@Tp-TPA.

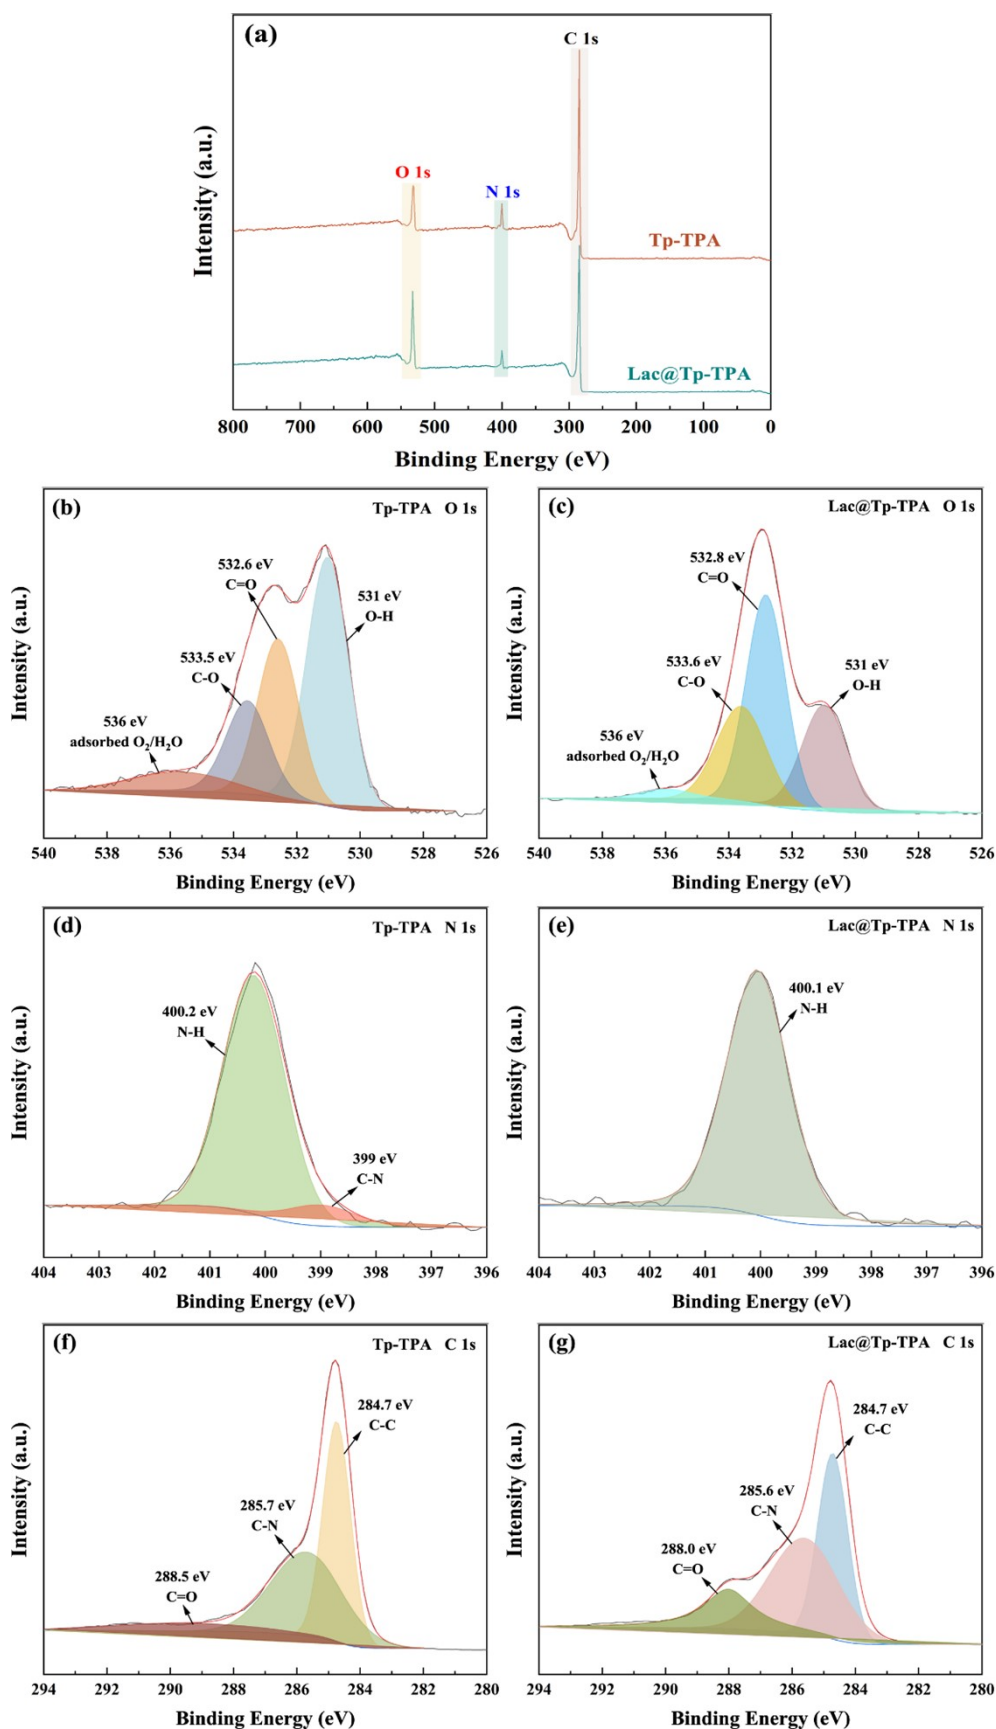

Fig. S4 (a) the XPS survey spectrum of Tp-TPA and Lac@Tp-TPA, the O 1s spectra of (b) Tp-TPA and (c) Lac@Tp-TPA, the N 1s spectra of (d) Tp-TPA and (e) Lac@Tp-TPA, the C 1s spectra of (f) Tp-TPA and (g) Lac@Tp-TPA.

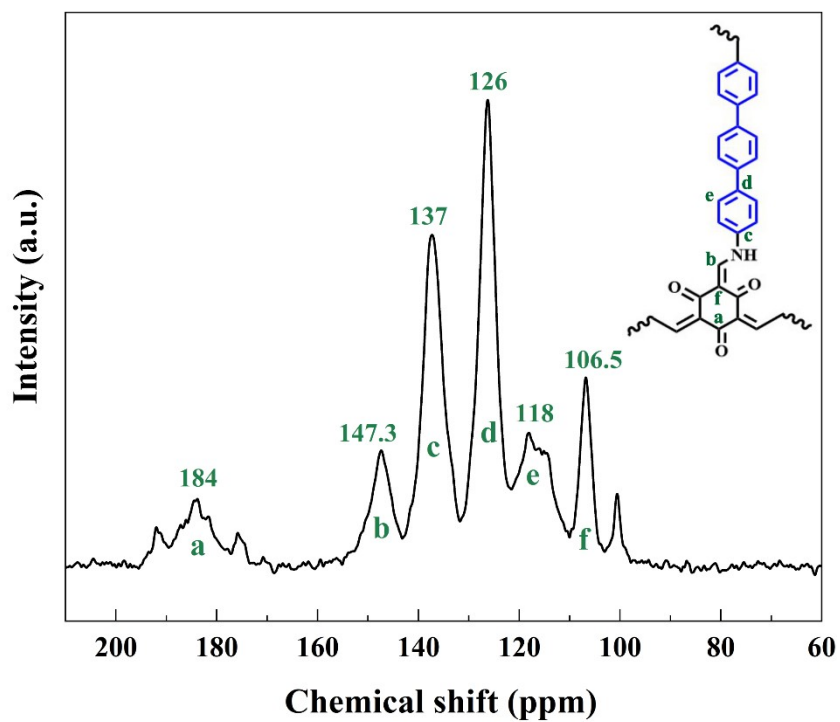

Fig. S5 Solid-state  $^{13}\text{C}$  CP-MAS NMR spectrum of Tp-TPA.



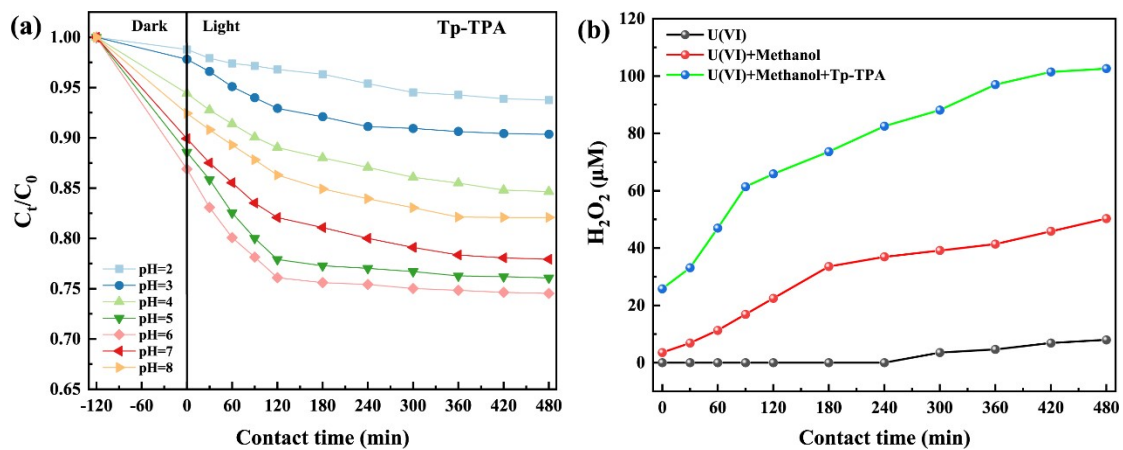

Fig. S6 (a) the performance of U(VI) photoreduction by Tp-TPA, (b) the generation of  $H_2O_2$  during photo-immobilization of U(VI) in Tp-TPA system under visible light ( $C_0=30$  mg/L,  $T=298$  K,  $pH=5.0$ ,  $m/V=0.1667$  g/L, 3 mL  $CH_3OH$ ).

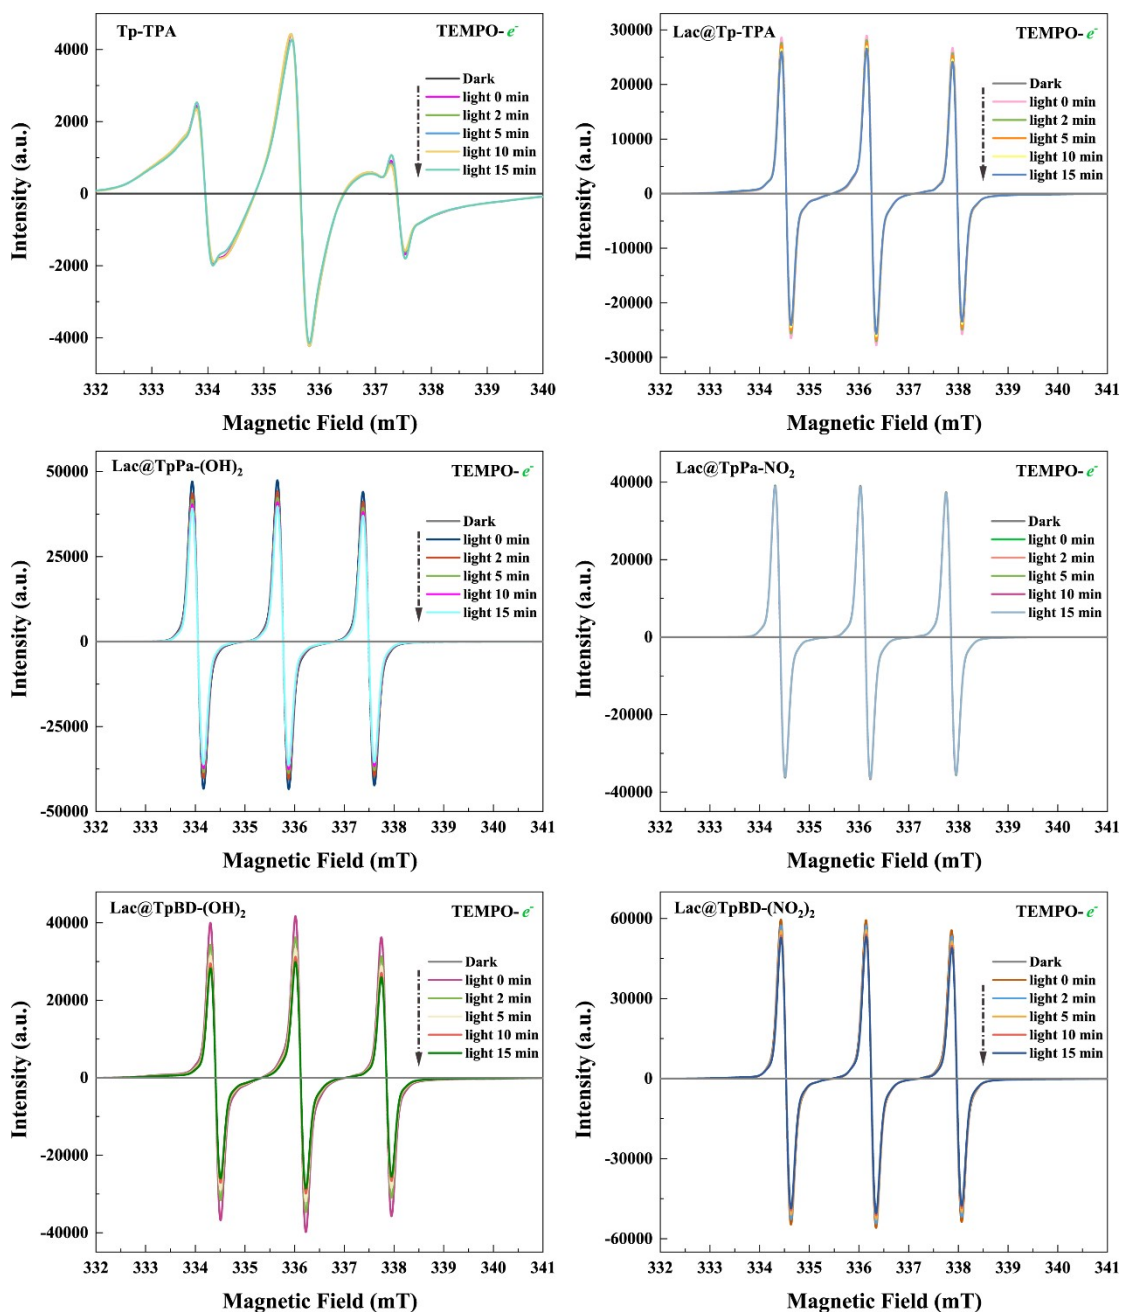

Fig. S7 The EPR spectra TEMPO- $e^-$  of Tp-TPA and Lac@COFs under illumination for different times.

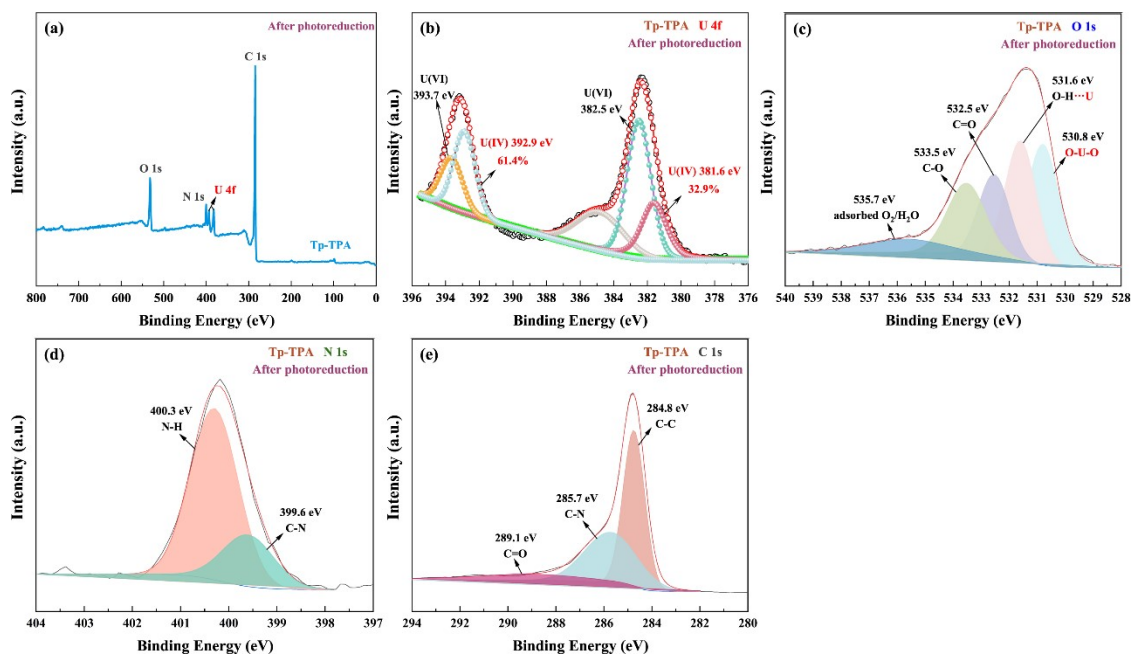

Fig. S8 (a) The XPS survey spectrum of Tp-TPA after photoreduction and the high-resolution (b) U 4f, (c) O 1s, (d) N 1s and (e) C 1s spectra of Tp-TPA after photoreduction.

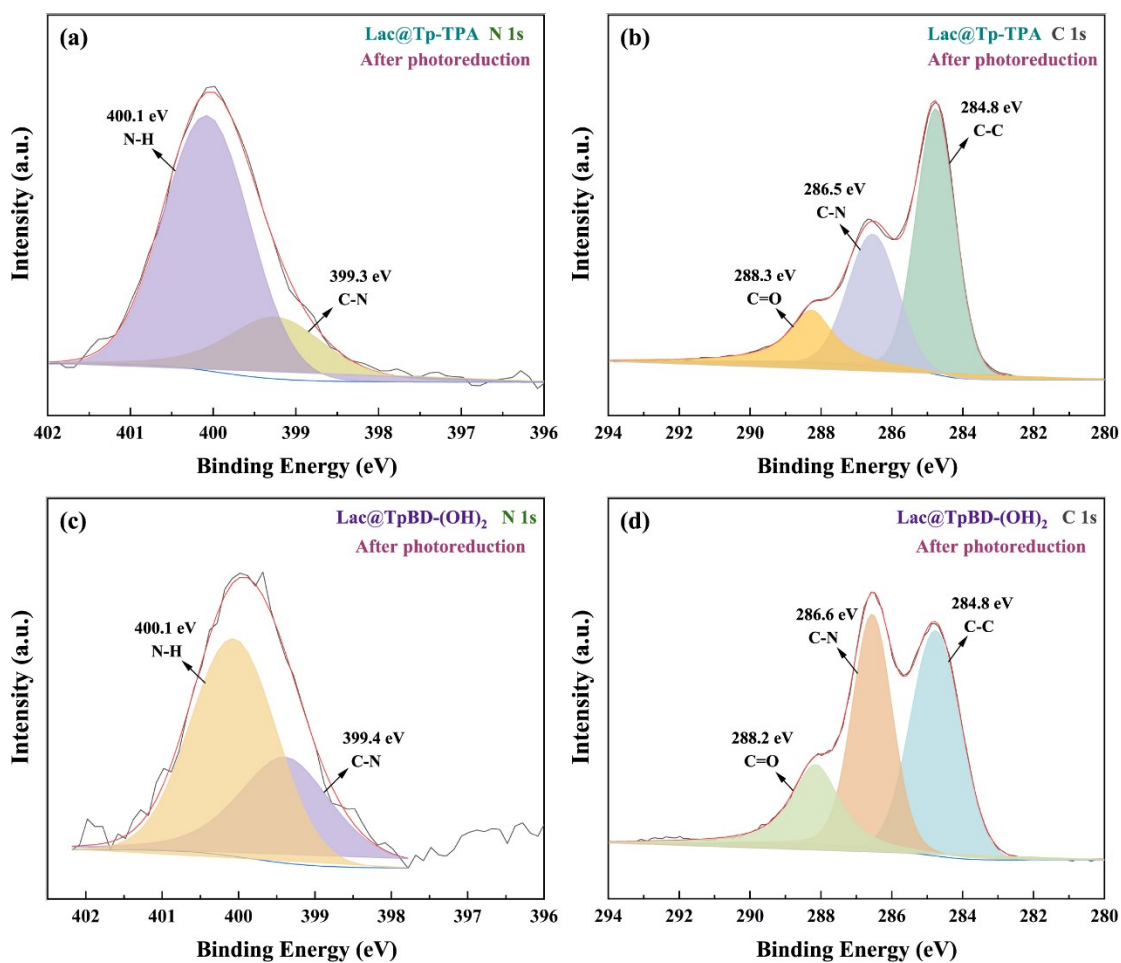

Fig. S9 The high-resolution (a) N 1s and (b) C 1s spectra of Lac@Tp-TPA after photoreduction, and the high-resolution (c) N 1s and (d) C 1s spectra of Lac@TpBD-(OH)<sub>2</sub> after photoreduction.

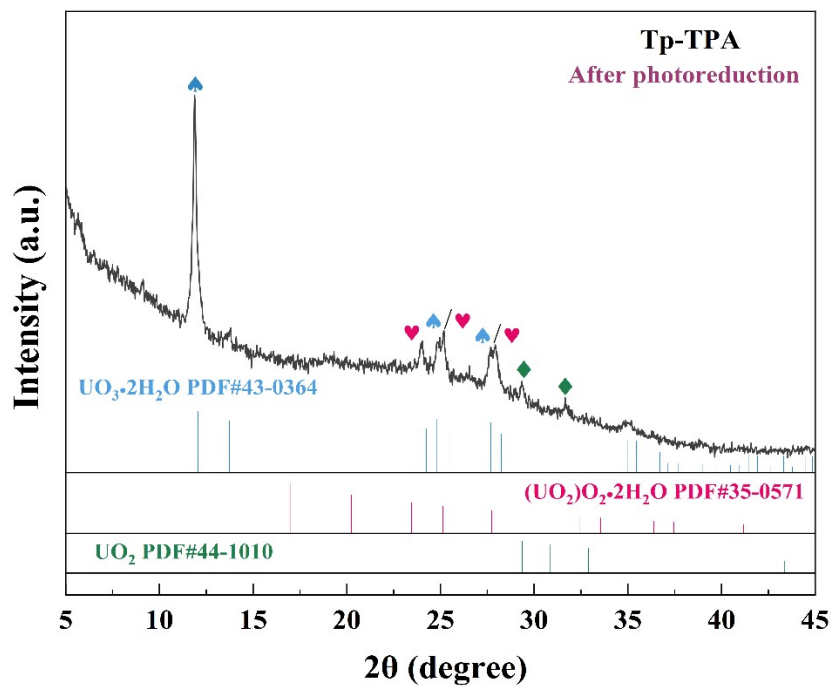

Fig. S10 The XRD pattern of Tp-TPA after U(VI) photoreduction under illumination.

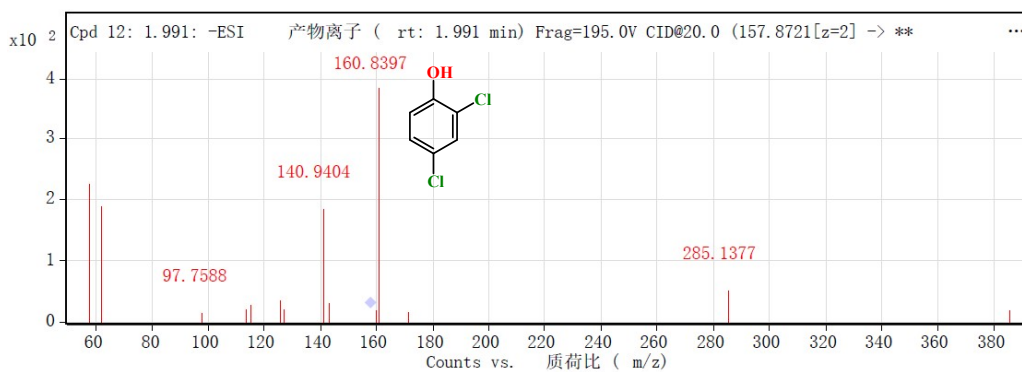

Fig. S11 The intermediates generated during 2,4-DCP degradation on Lac@Tp-TPA.

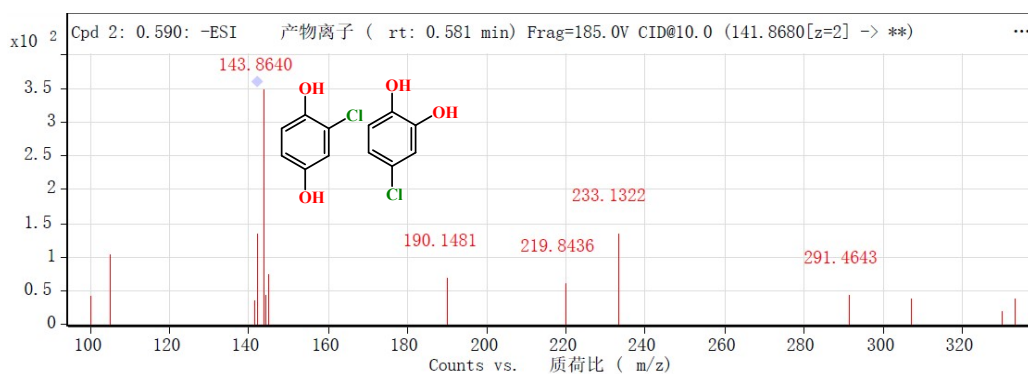

Fig. S12 The intermediates generated during 2,4-DCP degradation on Lac@Tp-TPA.

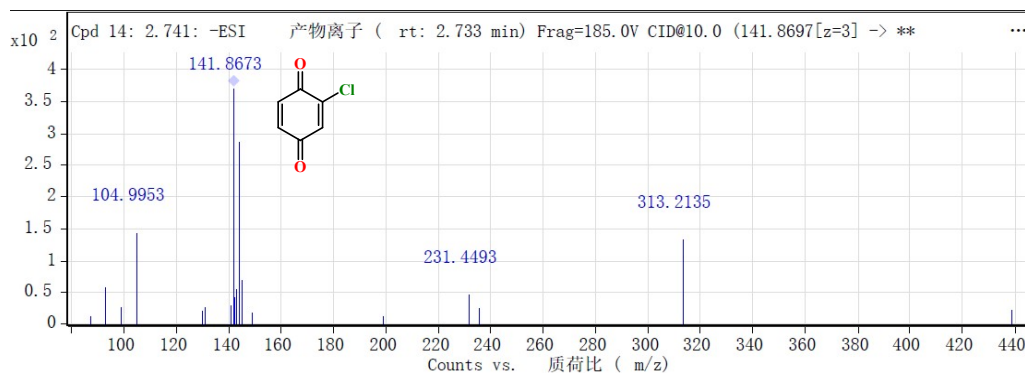

Fig. S13 The intermediates generated during 2,4-DCP degradation on Lac@Tp-TPA.

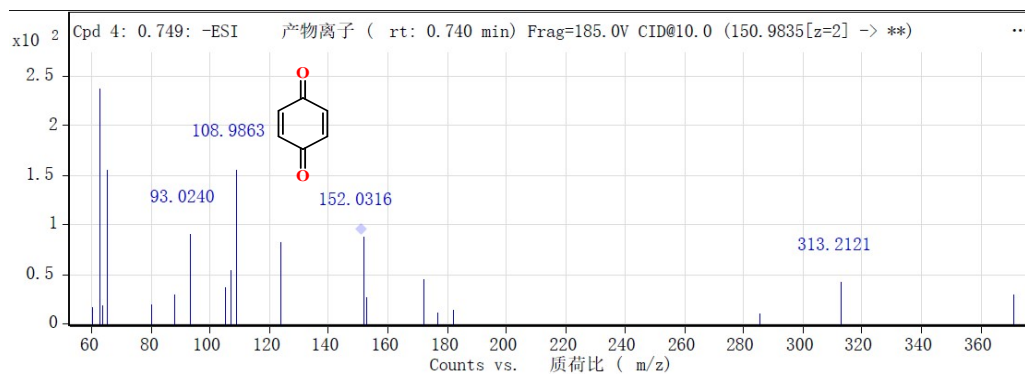

Fig. S14 The intermediates generated during 2,4-DCP degradation on Lac@Tp-TPA.

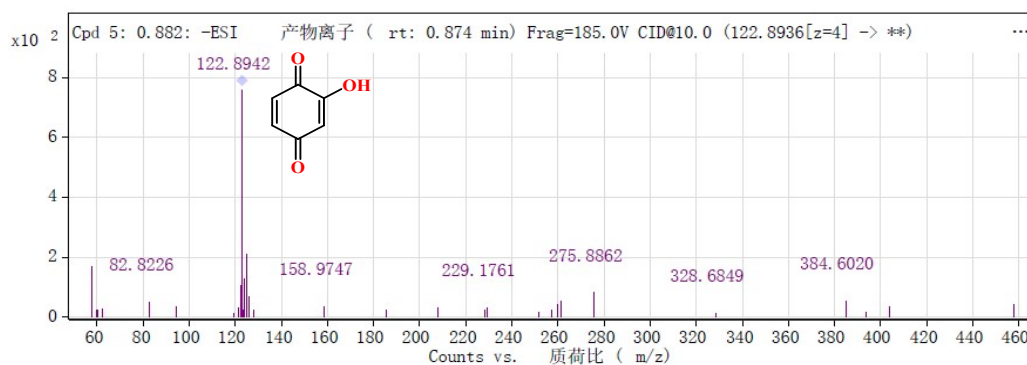

Fig. S15 The intermediates generated during 2,4-DCP degradation on Lac@Tp-TPA.

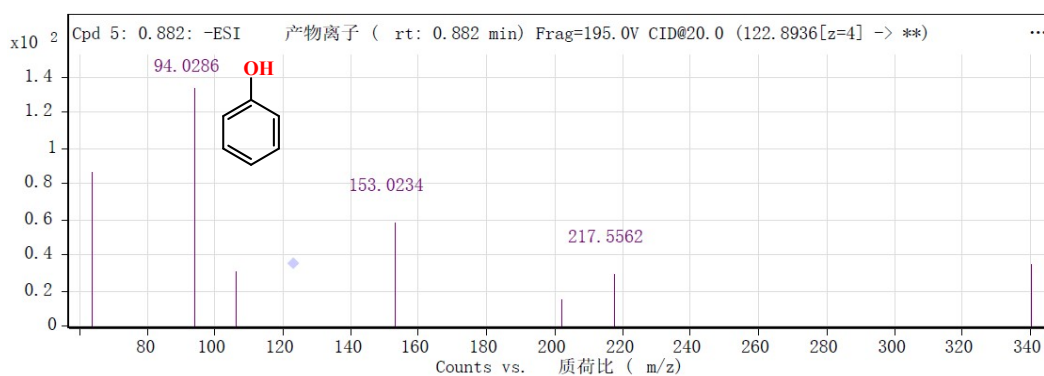

Fig. S16 The intermediates generated during 2,4-DCP degradation on Lac@Tp-TPA.

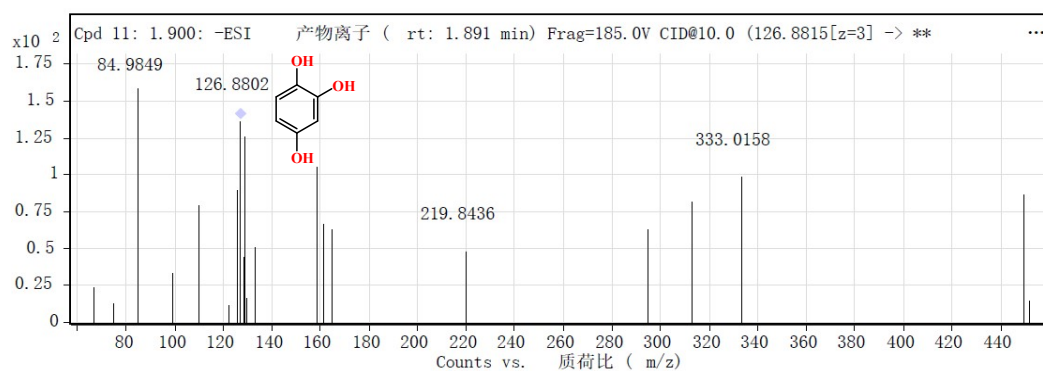

Fig. S17 The intermediates generated during 2,4-DCP degradation on Lac@Tp-TPA.

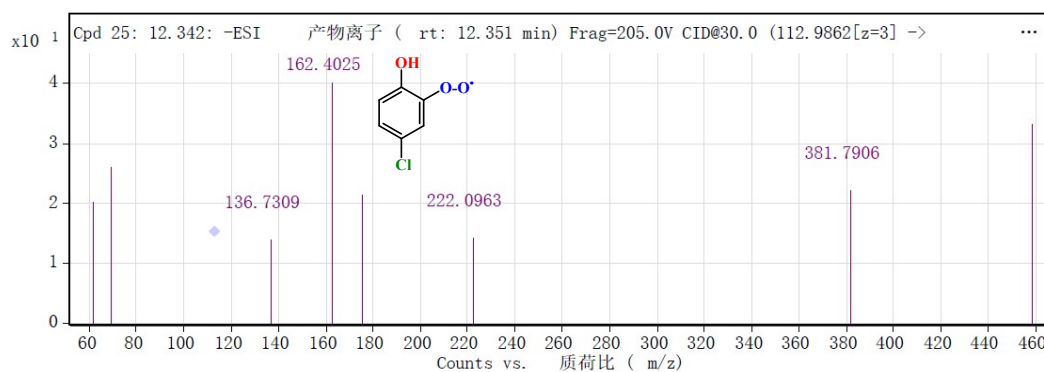

Fig. S18 The intermediates generated during 2,4-DCP degradation on Lac@Tp-TPA.

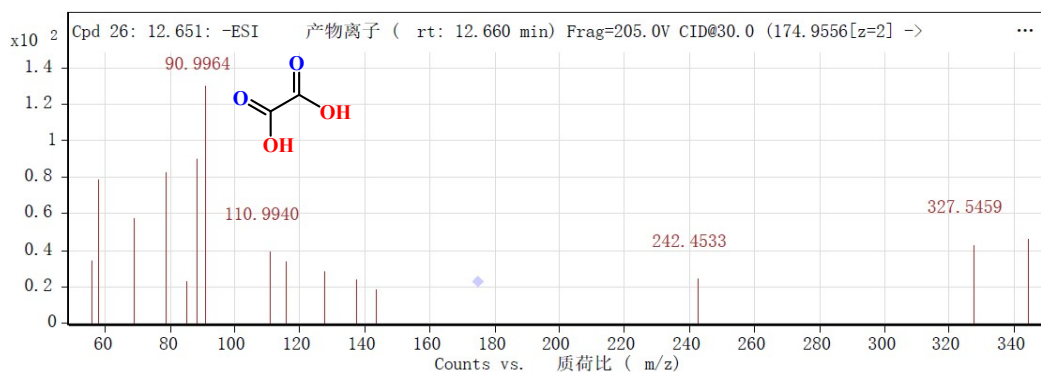

Fig. S19 The intermediates generated during 2,4-DCP degradation on Lac@Tp-TPA.

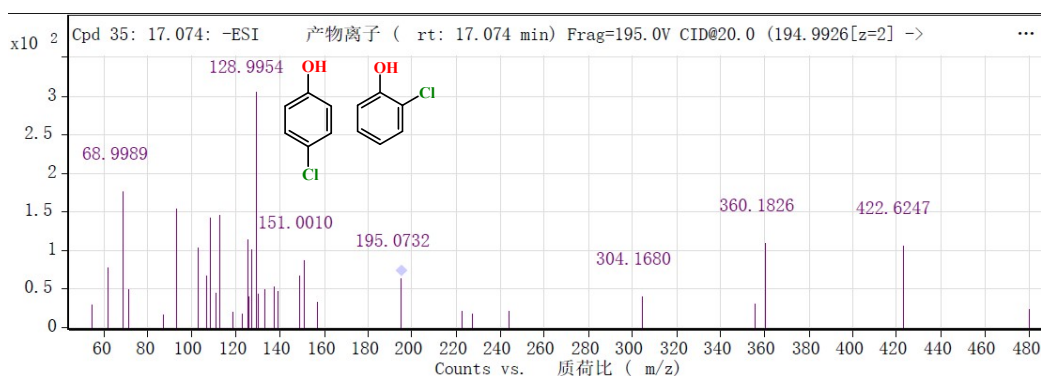

Fig. S20 The intermediates generated during 2,4-DCP degradation on Lac@Tp-TPA.

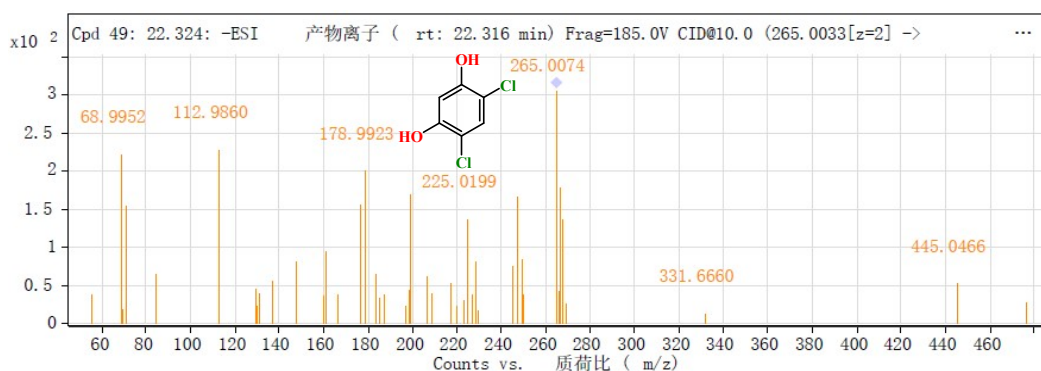

Fig. S21 The intermediates generated during 2,4-DCP degradation on Lac@Tp-TPA.

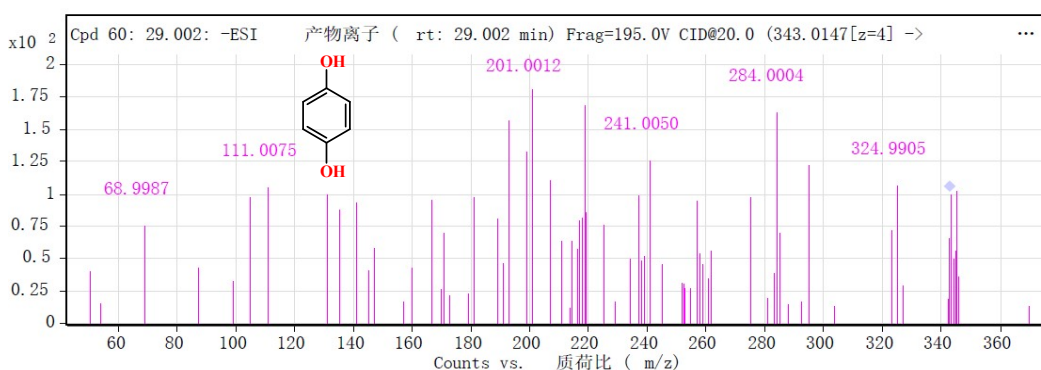

Fig. S22 The intermediates generated during 2,4-DCP degradation on Lac@Tp-TPA.



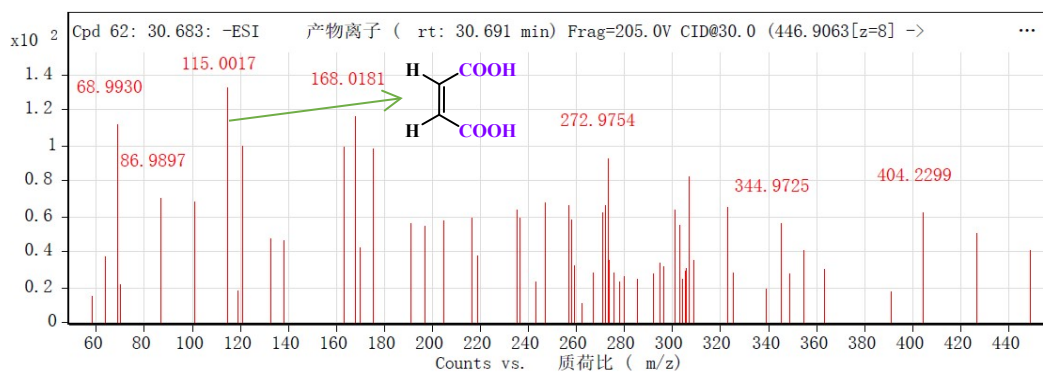

Fig. S23 The intermediates generated during 2,4-DCP degradation on Lac@Tp-TPA.

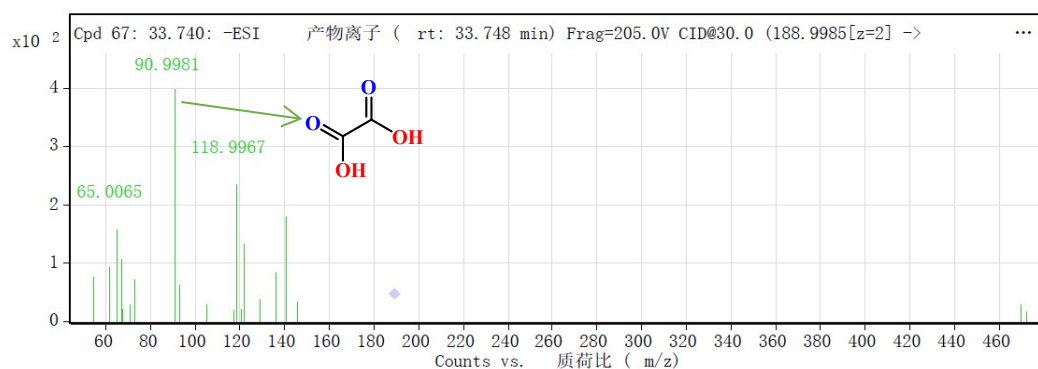

Fig. S24 The intermediates generated during 2,4-DCP degradation on Lac@Tp-TPA.

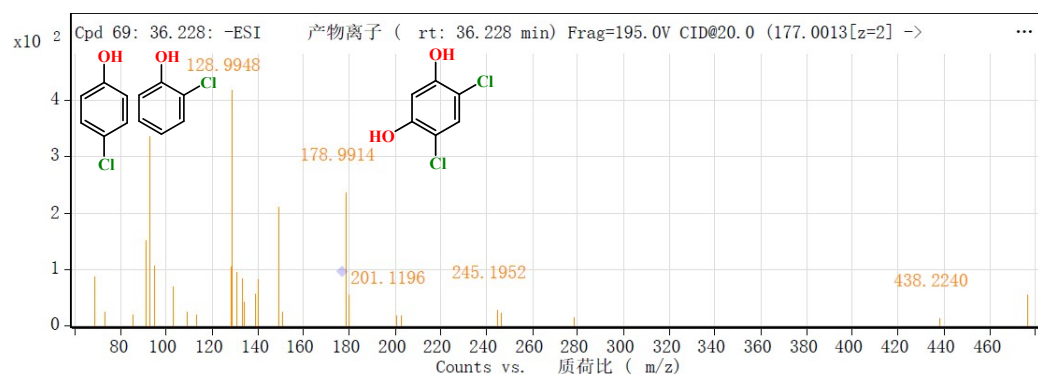

Fig. S25 The intermediates generated during 2,4-DCP degradation on Lac@Tp-TPA.

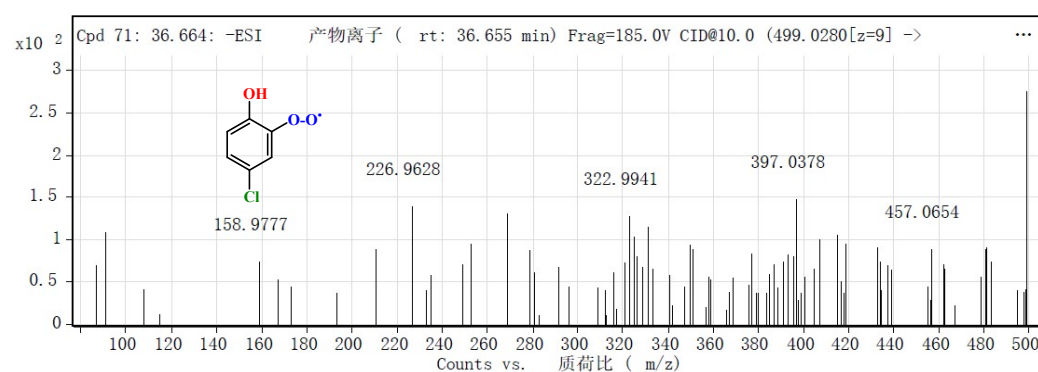

Fig. S26 The intermediates generated during 2,4-DCP degradation on Lac@Tp-TPA.

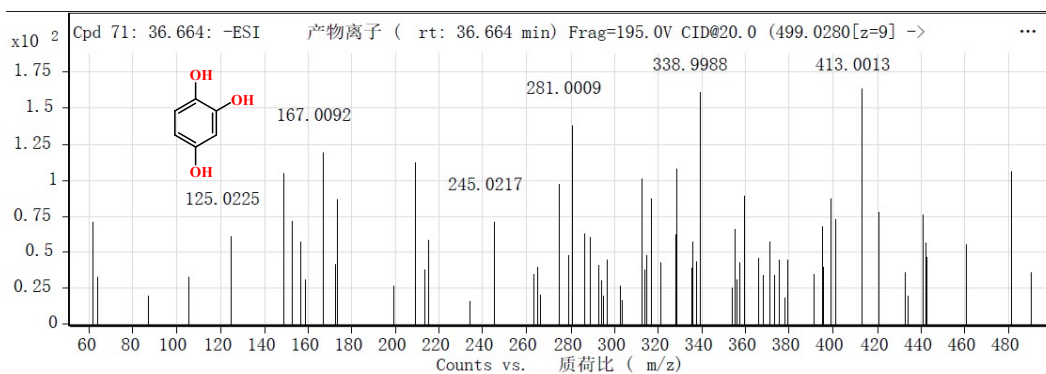

Fig. S27 The intermediates generated during 2,4-DCP degradation on Lac@Tp-TPA.

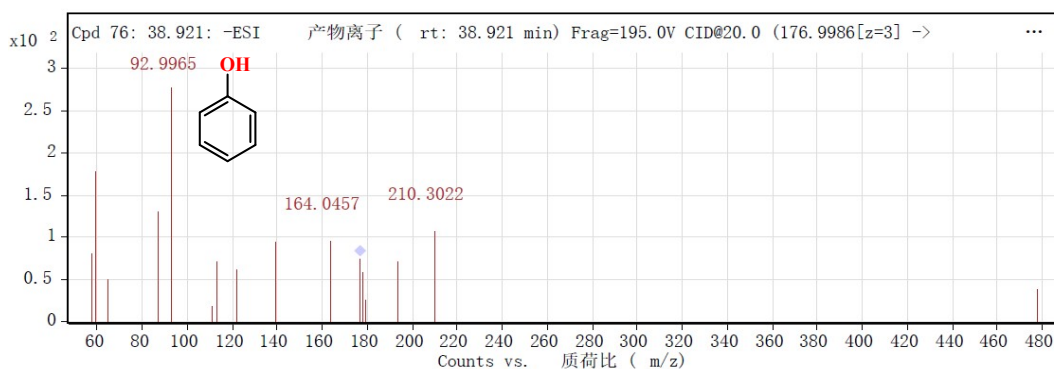

Fig. S28 The intermediates generated during 2,4-DCP degradation on Lac@Tp-TPA.

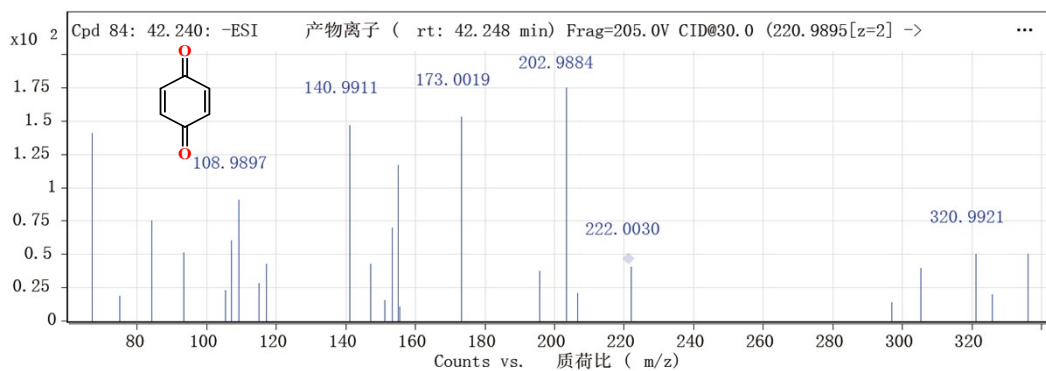

Fig. S29 The intermediates generated during 2,4-DCP degradation on Lac@Tp-TPA.

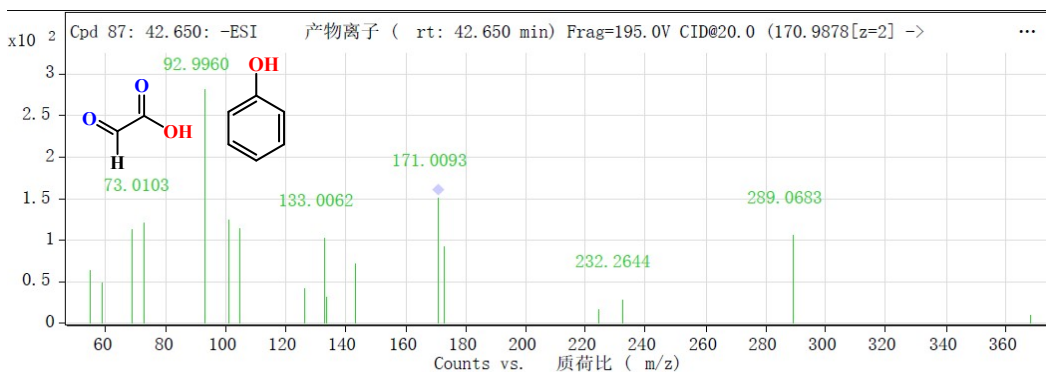

Fig. S30 The intermediates generated during 2,4-DCP degradation on Lac@Tp-TPA.

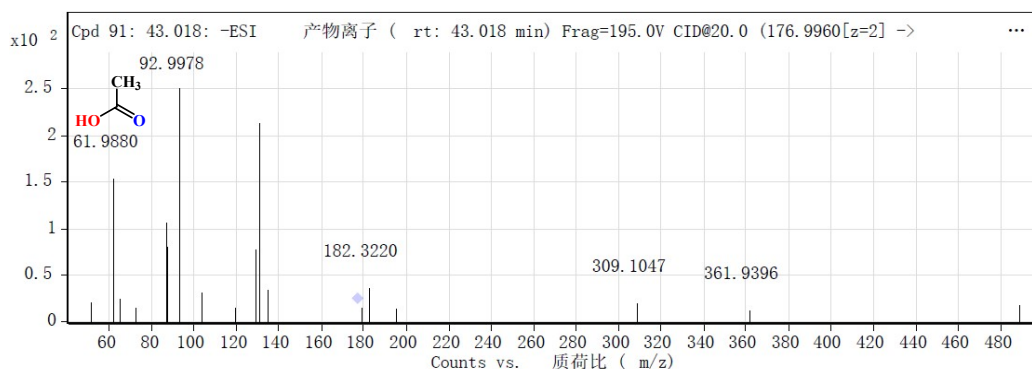

Fig. S31 The intermediates generated during 2,4-DCP degradation on Lac@Tp-TPA.

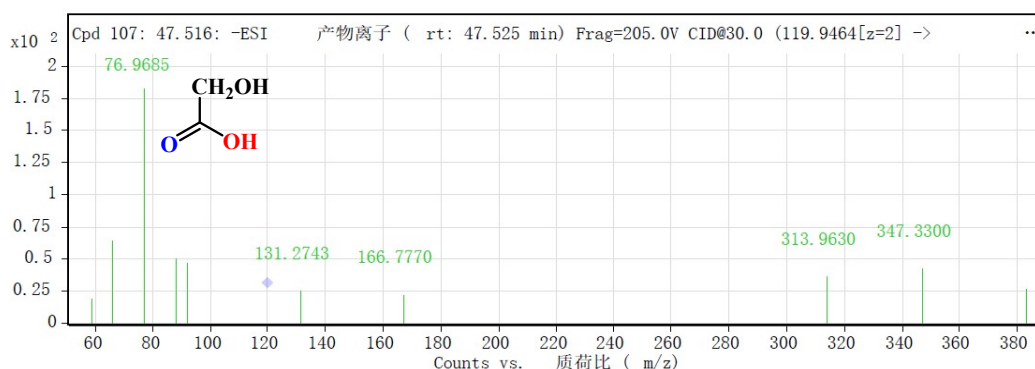

Fig. S32 The intermediates generated during 2,4-DCP degradation on Lac@Tp-TPA.

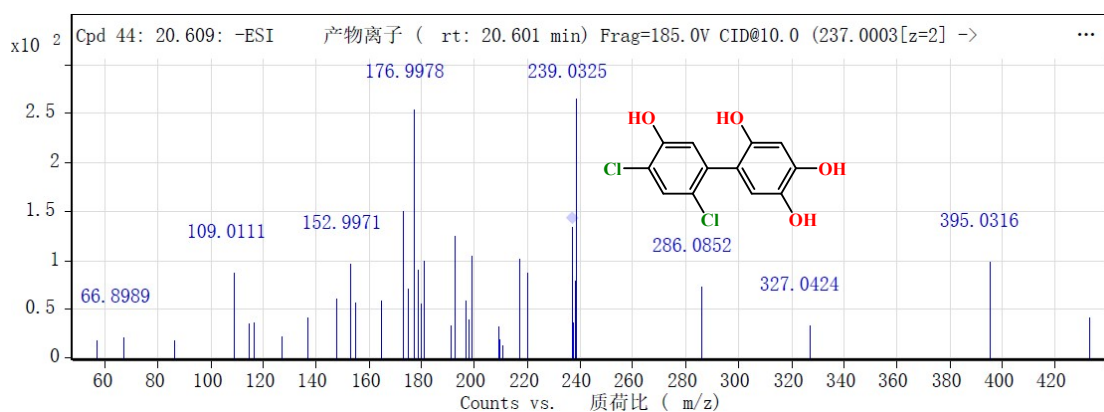

Fig. S33 The intermediates generated during 2,4-DCP degradation on Lac@Tp-TPA.

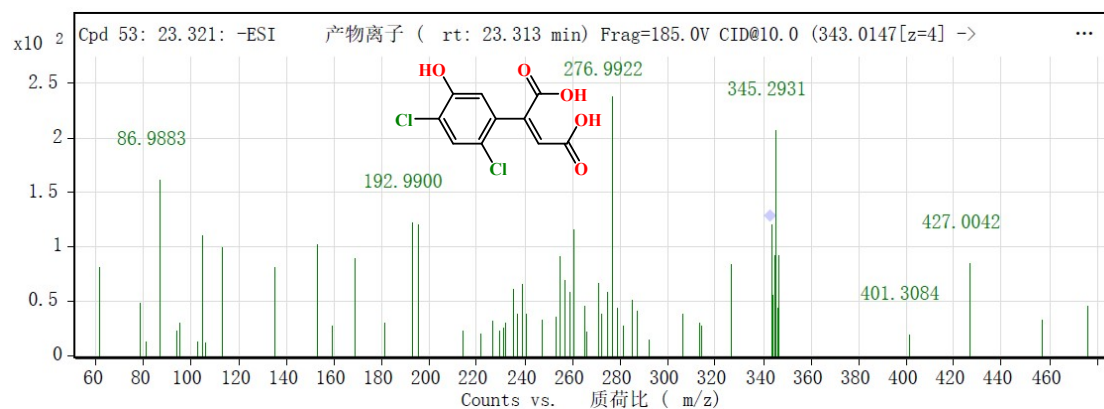

Fig. S34 The intermediates generated during 2,4-DCP degradation on Lac@Tp-TPA.

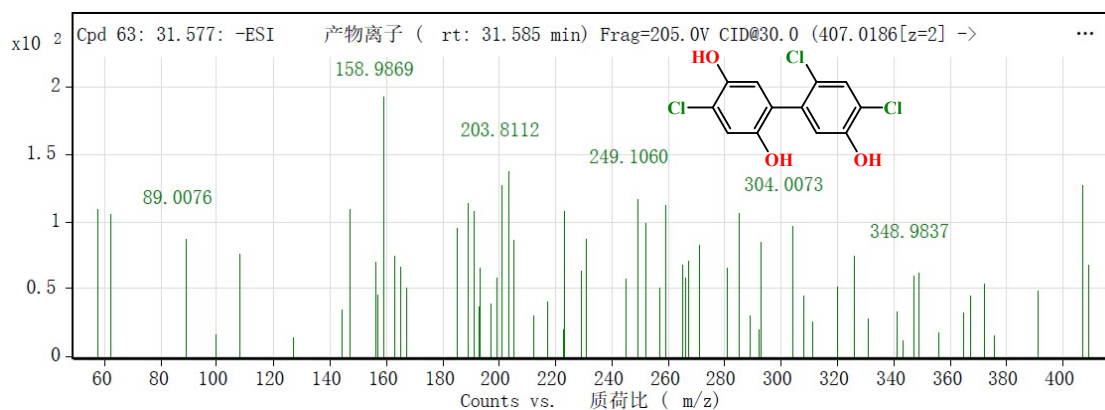

Fig. S35 The intermediates generated during 2,4-DCP degradation on Lac@Tp-TPA.

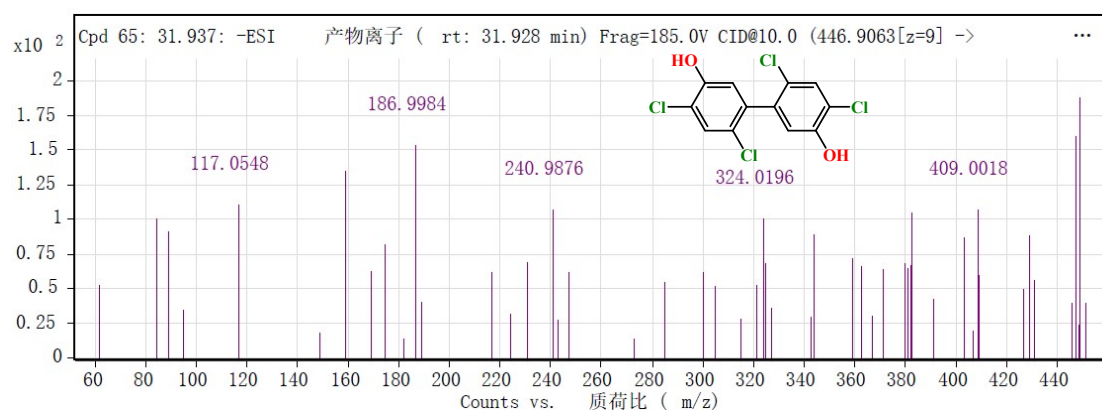

Fig. S36 The intermediates generated during 2,4-DCP degradation on Lac@Tp-TPA.

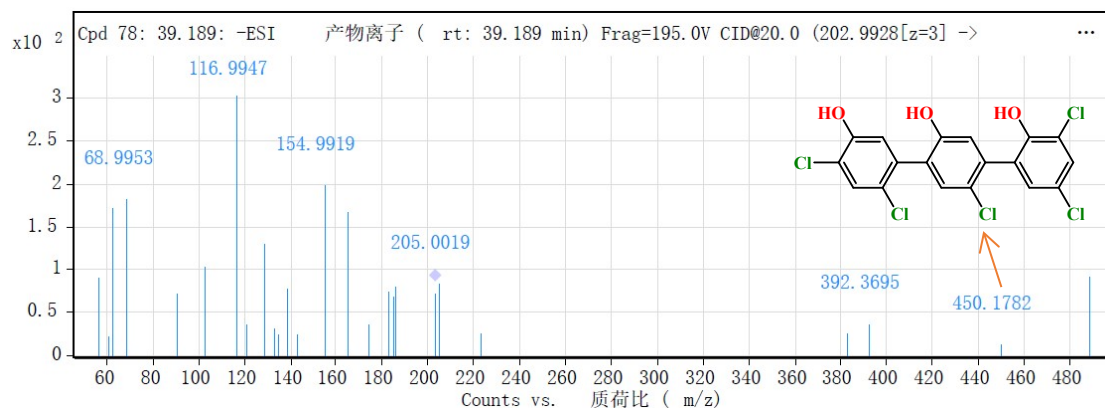

Fig. S36 The intermediates generated during 2,4-DCP degradation on Lac@Tp-TPA.

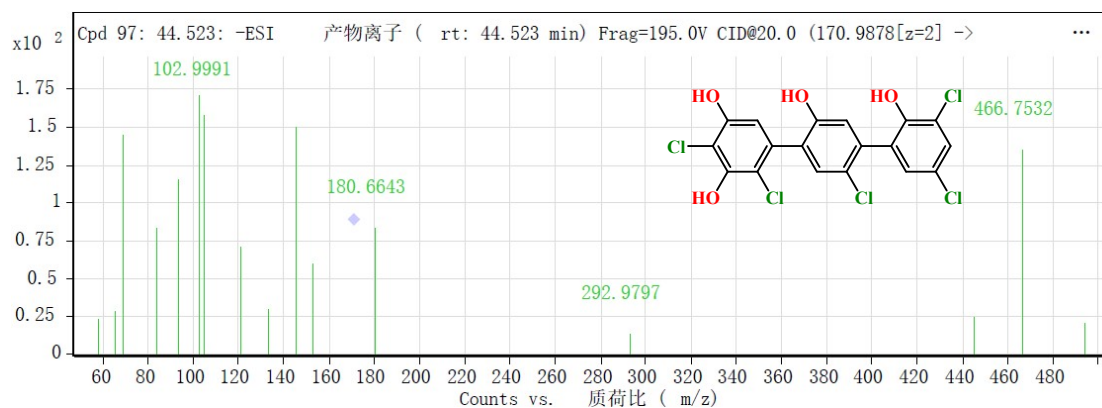

Fig. S37 The intermediates generated during 2,4-DCP degradation on Lac@Tp-TPA.
